26

## Abstract

### 27 Introduction

28 To promote holistic learning about Antimicrobial Resistance (AMR), catalyze  
29 multidisciplinary engagement, and innovative AMR interventions, it is important that learning  
30 goes beyond the classroom and students embrace different extracurricular interventions. This  
31 study aimed to determine knowledge, attitudes, and motivations influencing medical students'  
32 engagement in AMR Club Initiatives at Busitema University in Uganda.

### 33 Methodology

34 This was descriptive cross-sectional study conducted at Busitema University among  
35 undergraduate student pursuing Bachelors of Medicine and Surgery, Bachelor of Nursing, and  
36 Bachelor of Science in Anesthesia and Critical care. A semi structured pre-tested questionnaire  
37 was shared among the study participants. Bloom cut-off method was used to analyse the  
38 knowledge of the participants, chi square test used for bivariate analysis and multivariable  
39 logistic regression used for determining factors independently associated to students'  
40 engagement in AMR club activities.

### 41 Results

42 71.5% of the 193 students had sufficient knowledge (determined using Bloom's cutoff  
43 categories from 60% and above as sufficient and below 60% as insufficient) on AMR with an  
44 average score of 68.18% (SD= ±16.12). 90% of participants recognized the significance of  
45 incorporating AMR within their curriculum, and 87.5% appreciated the need for training AMR  
46 using a One Health Approach. The most common reasons why students engaged in  
47 extracurricular efforts to address AMR such as forming AMR clubs were found to be; influence  
48 from peers (n= 42), university support (n=35), and inspiration from peer mentors' work (n=35).

### 49 Conclusion

50 The students were found to have a high level of knowledge and positive attitudes towards AMR  
51 but reported the need for further in-depth training. Extra-curricular engagement such as  
52 participation in an AMR Club was found to positively influence students' engagement in AMR  
53 interventions.

54

55

## 56 **Introduction**

57 Antimicrobial Resistance (AMR) has been declared by the World Health Organization as one  
58 of the top 10 global health threats[1]. Despite the high mortality and burden caused by AMR,  
59 it is largely ignored and rarely prioritized relative to other global health threats[2]. In 2019,  
60 4.95 million deaths were associated with AMR globally, and 1.27million deaths were caused  
61 directly by resistant infections[3]. In Sub-Saharan Africa, bacterial AMR was associated with  
62 1.05 million deaths and attributed to 250,000 deaths[4]. In Uganda, 7,100 deaths were directly  
63 caused by bacterial drug-resistant infections, and 30,700 deaths were associated with drug-  
64 resistant infections[4].

65 Education and awareness play a very critical role in antimicrobial use and shape other health-  
66 seeking behaviors that influence AMR[5]. The Global Action Plan on AMR developed by the  
67 World Health Organization (WHO) lists improving awareness and understanding of AMR as  
68 its first objective[6]. It highlights the need to raise awareness and promote behavioral change  
69 through various ways such as public communication programs implemented from a One Health  
70 realm targeting human health, consumers, animal health, and agricultural practices. It also  
71 makes a case for inclusion of AMR into the curricula, and the professional training of health,  
72 veterinary, and agriculture sectors to promote a better understanding among professionals. The  
73 Uganda National Action Plan on AMR strategic objective one proposes the promotion of public  
74 awareness, training, and education through two major strategies; improving public awareness  
75 and supporting education and training of human, animal, plant, and environmental health  
76 through both pre-service and in-service training. Educating them very early in their training  
77 and practice provides them with a different perspective enabling them to challenge existing  
78 norms that undermine antimicrobial stewardship and also serve as AMR champions in their  
79 respective facilities. There have been several efforts in Uganda to incorporate AMR into the  
80 curriculum but they are yet to be successful[7].

81 A study conducted across East African Universities , reported that AMR was not emphasized  
82 in the medical curricula[8]. Comparable findings were reported in Ethiopia, Ghana and  
83 Zambia among nurses and pharmacy personnel and healthcare students' in regard to knowledge  
84 of Antibiotic use, AMR, and antimicrobial stewardship programs[9]. In Uganda, while the  
85 medical students were aware of the concept of AMR, they lacked in-depth knowledge  
86 necessary for effective antimicrobial stewardship practices[10]. A research conducted amongst

87 medical, pharmacy and nursing interns also showcased that only a small percentage of  
88 participants had good knowledge of AMR and rational prescription practices[11].

89 To promote behavior change, and inspire action among healthcare students, engagement should  
90 extend beyond traditional classroom settings to include holistic learning that incorporates both  
91 curricular and extracurricular activities[12]. From early in their training, tertiary level students  
92 should be empowered to engage in AMR. Extracurricular activities such as participation in  
93 clubs have been shown to enhance intrinsic motivation, and active participation in efforts to  
94 address various global health challenges[13]. To develop supportive frameworks where  
95 healthcare students can engage actively and empower communities on AMR, it is best to  
96 understand their perspective and drive to engage in such initiatives[14].

97 Currently, there is a paucity of data from African tertiary institutions on engagement of  
98 healthcare students in extracurricular activities on AMR. It is important to have evidence which  
99 can be harnessed to promote effective and beneficial extracurricular engagement among  
100 healthcare students. This study aimed to determine knowledge and perceptions on AMR among  
101 healthcare students and the motivation that influence healthcare students' participation in AMR  
102 extracurricular activities such as clubs.

## 103 **Methods and Materials**

### 104 **Study Design**

105 This study was a descriptive cross-sectional study employing quantitative data collection  
106 method to assess the level of awareness and knowledge of antimicrobial resistance and factors  
107 influencing healthcare students' engagement in AMR club initiatives at Busitema University.

### 108 **Study setting**

109 The study was conducted at Busitema university, Faculty of Health Sciences in Mbale, Eastern  
110 Uganda between December, 2023 and February, 2024.

### 111 **Study population**

112 These were undergraduate medical students pursuing Bachelor of Medicine and Bachelor of  
113 Surgery, Bachelor of Science in Nursing, Bachelor of Science in Anesthesia and Critical care  
114 at Busitema University.

### 115 **Eligibility criteria.**

116 The study included undergraduate students at Busitema University, Faculty of Health Sciences  
117 who were 18 years of age or older pursuing either Bachelor of Medicine and Bachelor of  
118 Surgery, or Bachelor of Science in Anesthesia and Critical Care, or Bachelor of Nursing  
119 Science. The students who were not at the Faculty due to other academic programs, such as  
120 anesthesia rotations or in their last semester of study were excluded.

## 121 **Study variables.**

### 122 **Dependent variable**

123 The dependent variable was students' engagement in AMR related activities.

### 124 **Independent variables.**

125 These included; socio-demographic characteristics like the age, sex, year of study and course  
126 of study, AMR Awareness, Knowledge levels on AMR, and Extracurricular activities  
127 engagement.

### 128 **Data collection tool and procedures**

129 We used a semi structured questionnaire which was self-developed and pretested before use.  
130 We uploaded the questionnaire onto KoBo Toolbox. KoBo Toolbox is an open-source software  
131 developed by the Harvard Humanitarian Initiative with support from United Nations agencies,  
132 CISCO, and partners to support data management by researchers and humanitarian  
133 organizations (<https://www.kobotoolbox.org/>). The servers are secure and encrypted with  
134 strong safe guards and protection against data loss. Participants who consented to the study had  
135 the questionnaire link sent to them via a WhatsApp message. The data collection tools were  
136 pretested before actual data collection.

### 137 **Sample size estimation and sampling technique.**

138 The sample size was determined using the formula by Fisher et al. (1998):  
139  $n = (Z^2 \times p(1-p)) / d^2$

140 Where:  $n$  = required sample size,  $Z$  = standard normal deviation at a 95% confidence interval  
141 (1.96),  $p$  = prevalence (0.5 due to no similar study found),  $d$  = margin of error or degree of  
142 accuracy (0.05)

143 After calculations,  $n=384.16$ , rounded to 385 participants. Since the population was less than  
144 10,000, the finite population correction formula was applied. With a population size of 500  
145 students, the final sample size was determined to be 218 study participants.

146 A list of all the students at the faculty was obtained, grouped as per the year of study. Random  
147 numbers were assigned to the names, they were then filled in a random selector program, that  
148 generated a random list of the numbers to which the names were attached. The selected students  
149 were then approached via a phone call or WhatsApp and given information about the study.  
150 Those that consented to participate in the study were recruited and the link to the questionnaire  
151 was sent to them. The reasons for engagement in AMR activities were first collected through  
152 a pre-study survey among 20 students to populate the questionnaire since we could not find  
153 any qualitative study that had been done about these reasons.

#### 154 **Data analysis and presentation**

155 The data collected was meticulously cleaned and analyzed using STATA version 15.0.  
156 Categorical data was analyzed using frequencies and percentages, while numerical data was  
157 analyzed using measures of Central Tendency and Dispersion. Pie charts were used to visually  
158 represent categorical data such as gender distribution, age groups, study programs, and year of  
159 study while bar graphs used to illustrate comparisons, such as students' engagement in  
160 extracurricular activities by gender, knowledge levels about AMR across different programs,  
161 and motivations for engaging in AMR club activities. Bivariate analysis investigated factors  
162 associated with students' engagement in AMR activities i.e. age groups, study program, year  
163 of study, knowledge about AMR, awareness about AMR, and participation in extracurricular  
164 activities and presented in tables while multivariable analysis further examined the significant  
165 factors identified in bivariate analysis to determine their combined impact on students'  
166 engagement in AMR activities and presented in figures including pie charts, bar graphs, and  
167 other visual aids to succinctly display key findings.

#### 168 **Ethical consideration.**

169 The study was conducted according to the Declaration of Helsinki. Ethical approval was sought  
170 and obtained from Busitema University Research Ethics committee under the reference number  
171 (BUFHS-2023-104) . Written informed consent was obtained from the participants before  
172 recruitment into the study. The data collected was kept in a locked folder in the computer which  
173 was accessible only to the investigators.

## 174 **Results**

### 175 **Social demographics of the participants**

176 A total of 193 students participated in the study. The majority of respondents were male  
177 (58.0%), while females comprised 42.0% of the participants. Over half of the respondents  
178 (51.3%) were below the age of 25, 40.4% were aged between 25-34, and a small proportion  
179 (8.3%) were above 35. The largest group of respondents were enrolled in the Bachelor of  
180 Medicine and Bachelor of Surgery program (63.2%). The Bachelor of Nursing Science  
181 program had 19.7% of respondents, and the Bachelor of Science in Anesthesia and Critical  
182 Care program had 17.1%. The distribution across years of study was relatively even, with the  
183 highest percentage in Year 4 (24.4%) and the lowest in Year 2 (17.1%). Year 1, Year 3, and  
184 Year 5 had 19.7%, 20.2%, and 18.7% of respondents, respectively (**Tabel 1**).

185 **Table 1: Showing the demographic statistics of the the study participants**

|                                                     | n (%)       |
|-----------------------------------------------------|-------------|
| <b>Gender</b>                                       |             |
| Female                                              | 81 (42.0%)  |
| Male                                                | 112 (58.0%) |
| <b>Age</b>                                          |             |
| Below 25                                            | 99 (51.3%)  |
| 25-34                                               | 78 (40.4%)  |
| Above 35                                            | 16 (8.3%)   |
| <b>Study program</b>                                |             |
| Bachelor of Medicine and Bachelor of Surgery        | 122 (63.2%) |
| Bachelor of Nursing Science                         | 38 (19.7%)  |
| Bachelor of Science in Anesthesia and Critical Care | 33 (17.1%)  |
| <b>Year of study</b>                                |             |
| Year 1                                              | 38 (19.7%)  |
| Year 2                                              | 33 (17.1%)  |
| Year 3                                              | 39 (20.2%)  |
| Year 4                                              | 47 (24.4%)  |
| Year 5                                              | 36 (18.7%)  |

186 n=193

### 187 **Students' engagement in extracurricular activities**

188 Extracurricular activities, in the context of this study, refer to general institutional activities  
189 outside the classroom that students participate in. The study found a difference in  
190 extracurricular engagement between genders: 82.05% of female students participated in  
191 extracurricular activities at the university, compared to 95.5% of male students (Figure 1).

192

*Figure 1: Showing students engagement in extracurricular activities; A; female, B: Male*

193

### 194 **Students' engagement in AMR club activities**

195 AMR clubs, which are among extracurricular activities, focus specifically on interventions  
196 related to antimicrobial resistance. At Busitema University, 67.5% of female participants  
197 reported not having participated in AMR club activities, compared to 58.18% of male  
198 students(**Figure 2**).

199

*Figure 2: Showing students engagement in AMR activities, A: Female, B: Male*

200

### 201 **Levels of knowledge about AMR among the students**

202 Overall, 71.5% of the students had sufficient knowledge about AMR (determined using  
203 Bloom's cutoff categories from 60% and above as sufficient and below 60% as insufficient).  
204 The percentage of students with sufficient AMR knowledge increased with each year of study,  
205 starting at 55.26% in Year 1 and rising to 91.67% in Year 5(Figure 3). Across the different  
206 programs of study, Bachelor of Medicine and Bachelor of Surgery had the highest percentage,  
207 76.23% of students with sufficient knowledge about AMR which was followed by Bachelor of  
208 Science in Anesthesia and Critical Care, 69.7% and Bachelor of Nursing Science at 57.89%  
209 (**Figure 4**).

210

211

212

213 *Figure 3 Showing knowledge levels across different years of study*

214 *Figure 4: Showing knowledge levels of students in different study programs*

215

216

217

218



## 219 Attitudes of students towards AMR

220 A total of 8.9 % (n=17) of the study participants agreed that purchasing antibiotics  
221 without prescription from pharmacies was acceptable. Over a quarter of the participants  
222 (35.3%, n=68,) agreed to not being at risk of getting an antibiotic-resistant infection as long as  
223 they took their antibiotics correctly. Furthermore, an overwhelming majority (83.4%, n=160)  
224 agreed that prescribing broad-spectrum antimicrobials instead of narrower spectrum options  
225 contributes to antimicrobial resistance.

226 Majority of the participants , 96.4% (n=186) acknowledged the critical importance of having a  
227 strong understanding of AMR in their medical careers. A substantial percentage 87.5% (n=169)  
228 agreed that poor infection control practices by healthcare professionals significantly contribute  
229 to the spread of antimicrobial resistance. Similarly, more than 80% of the students (n=164,  
230 85%) believed that the excessive use of antimicrobials in livestock contributes to the problem  
231 of antimicrobial resistance.

232 Regarding their practical experiences, 73.6% (n=142) of the students reported observing  
233 instances where antimicrobials were overused during their hospital rotations. Looking towards  
234 the future, over 40% (41.4%, n=80) of the participants expressed optimism that new  
235 antimicrobial agents capable of addressing resistance issues would likely be developed. These  
236 results are summarized in **Figure 5**.

237

238

239

240

241

242

243

244

245

246 *Figure 5: Showing students' attitudes towards AMR: SD-Strongly disagree, D-Disagree, N- Neutral, A- Agree, SA- Strongly Agree*

247

248

249 **Sources of information about AMR**

250 Academic learning platforms were the major sources of information regarding AMR(n=152).  
251 **(Figure 6).**

252

253 *Figure 6: Sources of AMR information used by study participants*

254

255

256

257

258 **Motivations to students for engaging in AMR club activities**

259 The largest proportion of students (n=42) were those motivated by peer to engage in AMR club  
260 activities while the least number (n=4) engaged in AMR activities to get information (*Figure*  
261 7).

262 **Figure 7: Showing reasons for student engagement in AMR activities**

263

264 A higher proportion of the students (59%, n=114) students engaged in extracurricular activities  
265 like clubs to create friendships and to exercise and gain physical fitness while the least number  
266 of the students engaged in extracurricular activities due to other reasons (n=5) which included  
267 inspiring others and getting knowledge for the future (**Table 2.**)

268 **Table 2: Reasons for engaging in Extracurricular activities by the study participants**

|                                                  | Number of students who selected |
|--------------------------------------------------|---------------------------------|
|                                                  | 77                              |
| To create friendships                            | 114                             |
| To exercise and gain physical fitness            | 114                             |
| To develop leadership skills                     | 70                              |
| To pass time                                     | 51                              |
| To contribute to well-being of society           | 66                              |
| To improve my CV                                 | 43                              |
| To get mentored into my future career            | 61                              |
| To improve job prospects after completing school | 41                              |
| Other reasons                                    | 5                               |

269

270

271 **Factors associated with student participation in AMR club activities**

272 Age, gender and program of study were not significantly associated with student participation  
273 in AMR club activities independently. Third year students had 3.12 times higher odds of  
274 engaging in AMR club activities than second year students and the result was statistically  
275 significant(cOR: 3.12, CI= 1.13-8.66, p=0.028).

276 Having sufficient knowledge about AMR had 2.21 times higher odds of engaging in AMR  
277 club activities than having insufficient knowledge and the result was statistically significant  
278 (cOR: 2.21, CI:1.10-4.42, p=0.026). Students who were aware about AMR had 3.24 times  
279 higher odds of engaging in AMR club activities than those who were not aware and the result  
280 was statistically significant(cOR:3.24, CI:1.17-8.96, p=0.023).

281 Students engaging in extracurricular activities had 12.55 times higher odds of engaging in  
282 AMR club activities than those who were engaging in extracurricular activities and the result  
283 was statistically significant(cOR: 12.55, CI: 1.64-96.19, p=0.015).

284 However, after adjusting for confounders, student's engagement in extracurricular activities  
285 had 14.45 times higher odds of engaging in AMR club activities than those who did not and  
286 the result was statistically significant (AOR: 14.45, CI: 1.84-113.52, p=0.011)(**Table 3**)

287

288

289

290

291

292

293

294

295

296 **Table 3: Showing bivariate and multivariable analysis for the factors affecting student**  
 297 **engagement in AMR.**

298

| Independent variables                 | Categories                   | Students' engagement in AMR club activities |                          |              |                             |
|---------------------------------------|------------------------------|---------------------------------------------|--------------------------|--------------|-----------------------------|
|                                       |                              | p-values                                    | Crude Odds Ratios(95%CI) | p-values     | Adjusted Odds Ratios(95%CI) |
| Gender                                | Male                         | 0.192                                       | 1.49(0.82-2.73)          |              |                             |
|                                       | Female                       | <i>Ref</i>                                  | <i>Ref</i>               |              |                             |
| Age(years)                            | Below 25                     | 0.105                                       | 3.00(0.80-11.31)         |              |                             |
|                                       | 25-34                        | 0.263                                       | 2.16(0.56-8.32)          |              |                             |
|                                       | Above 35                     | <i>Ref</i>                                  | <i>Ref</i>               |              |                             |
| Study program                         | Medicine and Surgery         | 0.745                                       | 1.15(0.51-2.59)          |              |                             |
|                                       | Nursing Science              | 0.509                                       | 1.39(0.52- 3.67)         |              |                             |
|                                       | Anesthesia and Critical Care | <i>Ref</i>                                  | <i>Ref</i>               |              |                             |
| Year of study                         | Year 1                       | 0.255                                       | 1.82(0.65-5.12)          | 0.401        | 1.60(0.53-4.80)             |
|                                       | Year 2                       | <i>Ref</i>                                  | <i>Ref</i>               | <i>Ref</i>   | <i>Ref</i>                  |
|                                       | *Year 3                      | <b>0.028</b>                                | 3.12(1.13-8.66)          | 0.084        | 2.67(0.88-8.15)             |
|                                       | Year 4                       | 0.095                                       | 2.31(0.87-6.19)          | 0.300        | 1.78(0.60-5.29)             |
|                                       | Year 5                       | 0.463                                       | 1.49(0.51-4.37)          | 0.973        | 1.02(0.32-3.24)             |
| Knowledge levels                      | Insufficient                 | <i>Ref</i>                                  | <i>Ref</i>               | <i>Ref</i>   | <i>Ref</i>                  |
|                                       | *Sufficient                  | <b>0.026</b>                                | 2.21(1.10-4.42)          | 0.451        | 1.40(0.58-3.38)             |
| AMR Awareness                         | Not aware                    | <i>Ref</i>                                  | <i>Ref</i>               | <i>Ref</i>   | <i>Ref</i>                  |
|                                       | *Aware                       | <b>0.023</b>                                | 3.24(1.17-8.96)          | 0.191        | 2.34(0.65-8.41)             |
| Extracurricular activities engagement | No                           | <i>Ref</i>                                  | <i>Ref</i>               | <i>Ref</i>   | <i>Ref</i>                  |
|                                       | *Yes                         | <b>0.015</b>                                | 12.55(1.64-96.19)        | <b>0.011</b> | 14.45(1.84-113.52)          |

299

300

301

302

303

## 304 Discussion

305 The study findings indicate that a higher proportion of the participants (95.5% of the male  
306 students, 82% of the female students) participated in extracurricular activities with students in  
307 lower academic years exhibiting lower knowledge levels about antimicrobial resistance  
308 compared to their fifth-year counterparts. These findings are consistent with a previous study,  
309 which reported higher knowledge levels among clinical students. Additionally, a study in  
310 Ghana showed a sequential increase in AMR knowledge across the years of study, suggesting  
311 that students were progressively exposed to more AMR concepts as they advanced in their  
312 education[10, 15]. Slightly lower levels of AMR knowledge among students have been  
313 reported in various studies across Africa. For instance, a study in the Democratic Republic of  
314 Congo and Ethiopia found that only 55% of students had sufficient knowledge about AMR,  
315 while in Zambia, 70% of students had adequate knowledge levels[9, 16, 17]. These studies  
316 suggest a significant knowledge gap among medical students about AMR across the continent  
317 and attributed to a diverse factors in different countries[10]. Therefore, there is a critical need  
318 for improved education on AMR among medical students in Uganda. Incorporating AMR  
319 education into the curriculum can ensure a large number of students are well-informed through  
320 a sustainable strategy.

321 The participants demonstrated a positive attitude towards the rational use of antibiotics, with  
322 the majority (87%, n= 168) disagreeing that it is appropriate to purchase antibiotics without a  
323 prescription. In contrast, a poor attitude was observed among participants in Sudan, where over  
324 59.6% believed it was acceptable to buy medications from a pharmacy without a  
325 prescription[18]. Over a half of the participants demonstrated a poor understanding on the  
326 spread of drug-resistant infections

327 Less than 50% of the students (n=68, 35.3%) agreed to being at risk of getting an antibiotic-  
328 resistant infection as long as they took their antibiotics correctly showcasing little  
329 understanding on spread of drug-resistant infections, while less than 83.1% that agreed that  
330 antimicrobial resistance affects animal health and production and human health-related science  
331 students had a positive feeling that inappropriate use of antimicrobials is one of the reasons for  
332 the occurrence of antimicrobial resistance[19]. 83.4% (n=160) agreed that prescribing broad  
333 spectrum antimicrobials when narrower spectrum antimicrobials are available increases  
334 antimicrobial resistance showcasing high understanding on prescribing practices. More than  
335 90% of the students(n=186, 96.4%) agreed that a strong knowledge of antimicrobials is

336 important in the medical career similar to other studies which shows that the overarching  
337 recognition on the need to have strong knowledge about AMR as health professionals enabling  
338 them to make better decisions for optimal health care delivery[10].

339 From the findings, 80% of the students (n=164, 85%) agreed that excessive use of  
340 antimicrobials in livestock causes antimicrobial resistance similar to other studies which shows  
341 appreciation on the role the one health approach in fight antimicrobial resistance by recognizing  
342 other sectors' importance. About two thirds of the students (n=142, 73.6%) agreed that  
343 antimicrobials were overused at the hospital where they had rotated compared to 36% from a  
344 previous study[20]. This shows a better attitude towards recognizing misuse as better stewards  
345 of antimicrobials. 41.4% of the students (n=80, 41.4%) agreed that new antimicrobials will be  
346 developed in the future that will keep up with the problem of resistance showcasing poor  
347 understanding on the complexity of AMR, and the multifaceted approach required.

348 Students' engagement in extracurricular activities was associated with engagement in AMR  
349 club activities even after adjusting for other factors because since AMR club was an  
350 extracurricular activity alongside the others, it was easier for the students already engaged in  
351 the other activities to take on AMR club activities.

352 Most students engaged in AMR club activities due to influence from peers, university support  
353 and mentors while the least engaged to get information and learning. This is mainly because  
354 students can easily access their peers and are more inspired and influenced by the actions of  
355 people within the same bracket[21].

## 356 **Conclusion**

357 In conclusion, the study reports a sequential increase in knowledge levels on AMR across the  
358 years of study amongst the study participants. The study showed that healthcare students  
359 appreciated the need and importance of AMR training through a One Health Approach and  
360 the importance of good infection prevention and control measures in addressing AMR.  
361 Influence from peer, university support and inspiration by peer mentors work were found to  
362 be the major reasons behind students' engagement in AMR related extracurricular activities.

## 363 **Recommendations**

364 From our findings, we recommend that, an AMR and AMS course unit should be incorporated  
365 into the preservice training of healthcare students so that there is a greater understanding of  
366 Antimicrobial Resistance and the topic and potential mitigation efforts. Furthermore, there is

367 need to emphasize on the value of extracurricular engagement in AMR among healthcare  
368 students and to leverage on peer support and mentorship to promote holistic learning and  
369 effective community engagement in AMR. Lastly, we recommend a broader study  
370 incorporating multiple institutions in investigating the drivers and barriers of healthcare  
371 students in extracurricular AMR engagements to obtain generalizable results that can inform  
372 the country's AMR policies.

### 373 **Limitations**

374 1. The study was done in one university therefore it may be difficult to generalize the  
375 findings at a country level.

### 376 **Acknowledgements**

377 The authors thank all the students who participated in the study for their feedback. We are  
378 grateful the Foundation to Prevent Antibiotic Resistance for grant awarded to support this  
379 project that was aimed at catalyzing grassroots engagement of tertiary level students in  
380 different countries in Africa. We thank Busitema University Antimicrobial Resistance and  
381 Stewardship Club and Busitema University Research and Innovation Association for  
382 allowing us to use their structures to implement the study. We thank ReAct (Action on  
383 Antibiotic Resistance) Africa and Zihi Institute for the technical support in implementation of  
384 this study.

### 385 **Funding**

386 A part of this study was funded by the Foundation to Prevent Antibiotic Resistance in a grant  
387 that run from 2022 – 2023 offered to Students Against Superbugs Africa (now Zihi Institute)  
388 in collaboration with ReAct Africa. The funders had no role in: the design and conduct of the  
389 study; data collection; data management, and analysis; review of the manuscript; and the  
390 decision to submit the manuscript for publication.

### 391 **Competing interests**

392 All authors have nothing to declare.

393

394

395



396

397

## References

- 398 1. World Health Organisation. Antimicrobial Resistance: WHO; 2024 [cited 2024 25th  
399 October]. Available from: [https://www.who.int/docs/default-source/antimicrobial-](https://www.who.int/docs/default-source/antimicrobial-resistance/amr-factsheet.pdf)  
400 [resistance/amr-factsheet.pdf](https://www.who.int/docs/default-source/antimicrobial-resistance/amr-factsheet.pdf).
- 401 2. Coque TM, Canton R, Perez-Cobas AE, Fernandez-de-Bobadilla MD, Baquero F.  
402 Antimicrobial Resistance in the Global Health Network: Known Unknowns and Challenges  
403 for Efficient Responses in the 21st Century. *Microorganisms*. 2023;11(4):1050. Epub  
404 20230417. doi: 10.3390/microorganisms11041050. PubMed PMID: 37110473; PubMed  
405 Central PMCID: PMCPCMC10144039.
- 406 3. Murray CJL, Ikuta KS, Sharara F, Swetschinski L, Robles Aguilar G, Gray A, et al.  
407 Global burden of bacterial antimicrobial resistance in 2019: a systematic analysis. *The*  
408 *Lancet*. 2022;399(10325):629-55. doi: 10.1016/S0140-6736(21)02724-0.
- 409 4. Sartorius B, Gray AP, Weaver ND, Aguilar GR, Swetschinski LR, Ikuta KS, et al.  
410 The burden of bacterial antimicrobial resistance in the WHO African region in 2019: a cross-  
411 country systematic analysis. *The Lancet Global Health*. 2024;12(2):e201-e16.
- 412 5. Fuller W, Kapona O, Aboderin AO, Adeyemo AT, Olatunbosun OI, Gahimbare L, et  
413 al. Education and Awareness on Antimicrobial Resistance in the WHO African Region: A  
414 Systematic Review. *Antibiotics*. 2023;12(11):1613. doi: 10.3390/antibiotics12111613.
- 415 6. Team EE. WHO member states adopt global action plan on antimicrobial resistance.  
416 *Eurosurveillance*. 2015;20(21):21137.
- 417 7. Waswa J, Kiggundu R, Joshi MP, Mpagi J, Kasujja H, Murungi M, et al. Addressing  
418 gaps in AMR awareness in the public: an evidence-based policy brief to guide school  
419 curriculum review in Uganda. *Frontiers in Public Health*. 2023;11:1287523.
- 420 8. Ampaire L, Muhindo A, Orikiriza P, Mwanga-Amumpaire J, Bebell L, Boum Y. A  
421 review of antimicrobial resistance in East Africa. *Afr J Lab Med*. 2016;5(1):432. doi:  
422 10.4102/ajlm.v5i1.432.
- 423 9. Tembo N, Mudenda S, Banda M, Chileshe M, Matafwali S. Knowledge, attitudes and  
424 practices on antimicrobial resistance among pharmacy personnel and nurses at a tertiary  
425 hospital in Ndola, Zambia: implications for antimicrobial stewardship programmes. *JAC-*  
426 *Antimicrobial Resistance*. 2022;4(5):dlac107. doi: 10.1093/jacamr/dlac107.
- 427 10. Kanyike AM, Olum R, Kajjimu J, Owembabazi S, Ojilong D, Nassozi DR, et al.  
428 Antimicrobial resistance and rational use of medicine: knowledge, perceptions, and training  
429 of clinical health professions students in Uganda. *Antimicrob Resist Infect Control*.  
430 2022;11(1):145. doi: 10.1186/s13756-022-01186-9.
- 431 11. Nabidda S, Ssenyonjo R, Atwaru J, Kanyike AM, Baryayaka S, Pangholi K, et al.  
432 Antimicrobial resistance and rational prescription practices: knowledge, perceptions and  
433 confidence of health profession interns in Uganda. *JAC-Antimicrobial Resistance*.  
434 2023;5(5):dlad105.
- 435 12. Munir S, Zaheer M. The role of extra-curricular activities in increasing student  
436 engagement. *Asian Association of Open Universities Journal*. 2021;16(3):241-54.
- 437 13. Achar Fujii RN, Kobayasi R, Claassen Enns S, Zen Tempski P. Medical Students'  
438 Participation in Extracurricular Activities: Motivations, Contributions, and Barriers. A  
439 Qualitative Study. *Adv Med Educ Pract*. 2022;13:1133-41. doi: 10.2147/AMEP.S359047.
- 440 14. Roulin N, Bangerter A. Extracurricular activities in young applicants' résumés: What  
441 are the motives behind their involvement? *International Journal of Psychology*.  
442 2013;48(5):871-80. doi: 10.1080/00207594.2012.692793.

- 443 15. Sefah IA, Akwaboah E, Sarkodie E, Godman B, Meyer JC. Evaluation of Healthcare  
444 Students' Knowledge on Antibiotic Use, Antimicrobial Resistance and Antimicrobial  
445 Stewardship Programs and Associated Factors in a Tertiary University in Ghana: Findings  
446 and Implications. *Antibiotics*. 2022;11(12):1679. doi: 10.3390/antibiotics11121679.
- 447 16. Bogale AA, Amhare AF, Chang J, Bogale HA, Betaw ST, Gebrehiwot NT, et al.  
448 Knowledge, attitude, and practice of self-medication with antibiotics among community  
449 residents in Addis Ababa, Ethiopia. *Expert Review of Anti-infective Therapy*.  
450 2019;17(6):459-66. doi: 10.1080/14787210.2019.1620105.
- 451 17. Thriemer K, Katuala Y, Batoko B, Alworonga J-P, Devlieger H, Van Geet C, et al.  
452 Antibiotic Prescribing in DR Congo: A Knowledge, Attitude and Practice Survey among  
453 Medical Doctors and Students. *PLoS ONE*. 2013;8(2):e55495. doi:  
454 10.1371/journal.pone.0055495.
- 455 18. Ibrahim Ahmed MA. Antibacterial Agents: Knowledge and Attitudes of Sudanese  
456 College of Medicine Undergraduates. *IJCMCR*. 2023;30(1). doi:  
457 10.46998/IJCMCR.2023.30.000729.
- 458 19. Abunna F, Gebresenbet G, Megersa B. Knowledge, attitude, and practices (KAP) of  
459 University students regarding antimicrobial use (AMU) and antimicrobial resistance (AMR)  
460 in Ethiopia. 2023.
- 461 20. Minen MT, Duquaine D, Marx MA, Weiss D. A Survey of Knowledge, Attitudes, and  
462 Beliefs of Medical Students Concerning Antimicrobial Use and Resistance. *Microbial Drug  
463 Resistance*. 2010;16(4):285-9. doi: 10.1089/mdr.2010.0009.
- 464 21. Qureshi MA, Khaskheli A, Qureshi JA, Raza SA, Yousufi SQ. Factors affecting  
465 students' learning performance through collaborative learning and engagement. *Interactive  
466 Learning Environments*. 2023;31(4):2371-91.

467

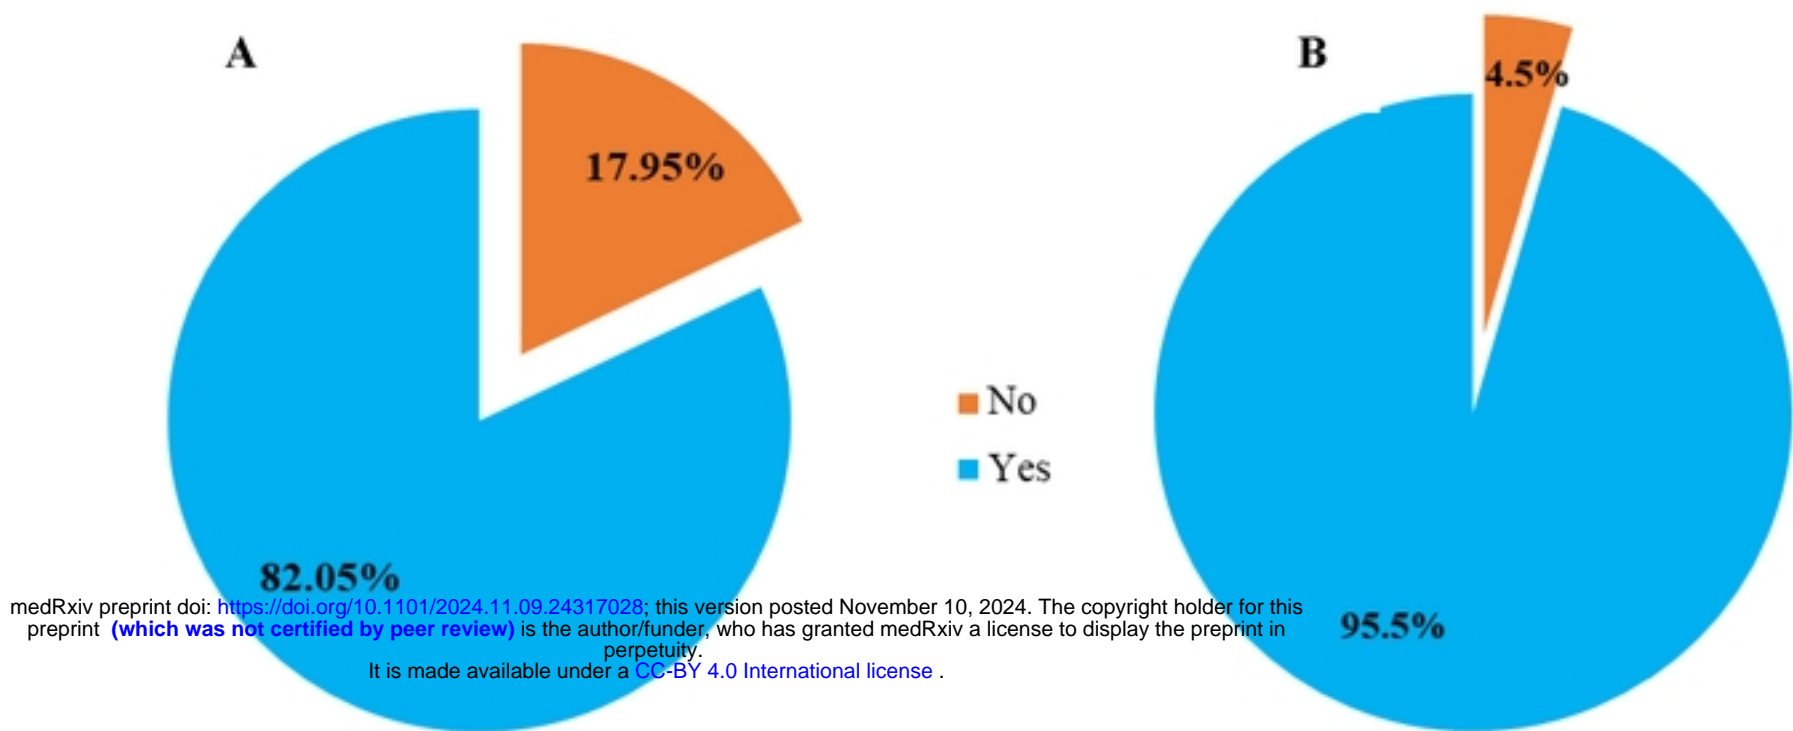

Figure 1: Showing students engagement in extracurricular activities; A; female, B: Male

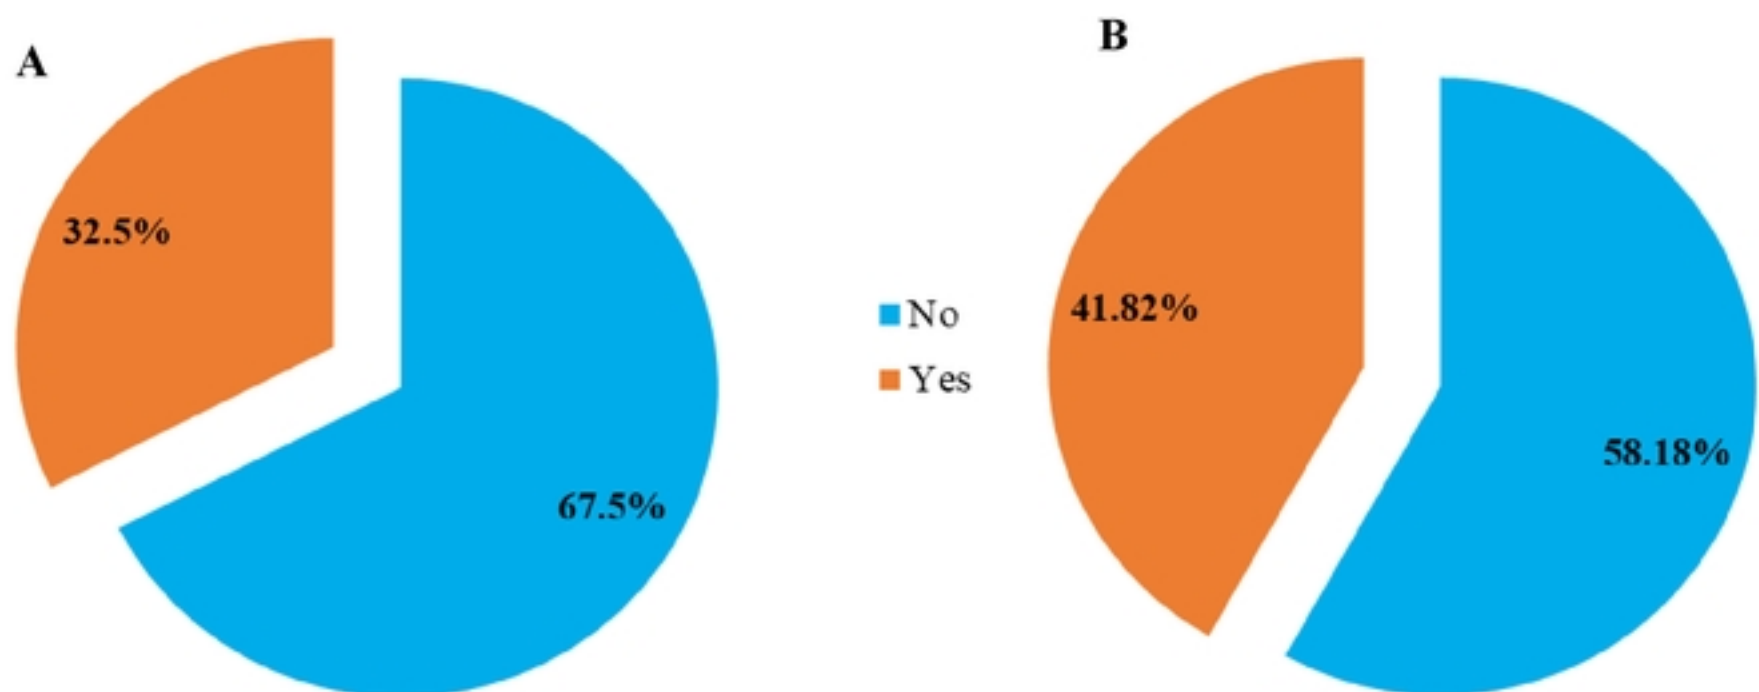

Figure 2: Showing students engagement in AMR activities, A: Female, B: Male

medRxiv preprint doi: <https://doi.org/10.1101/2024.11.09.24317028>; this version posted November 10, 2024. The copyright holder for this preprint (which was not certified by peer review) is the author/funder, who has granted medRxiv a license to display the preprint in perpetuity. It is made available under a [CC-BY 4.0 International license](https://creativecommons.org/licenses/by/4.0/).

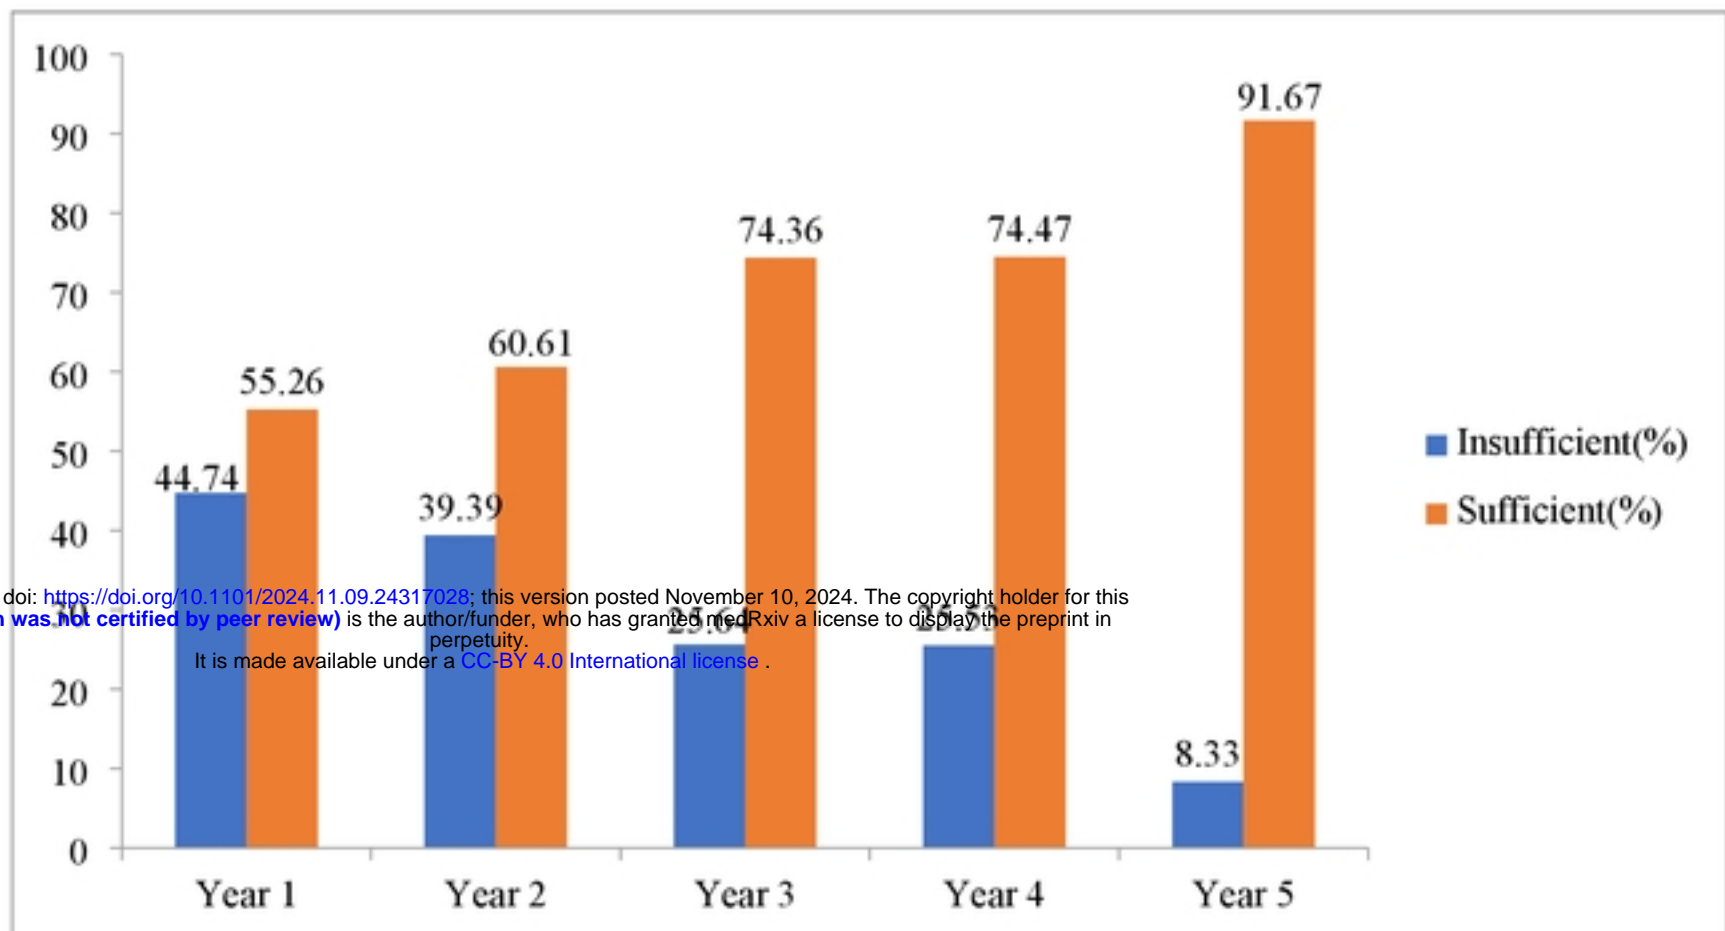

Figure 3 Showing knowledge levels across different years of study

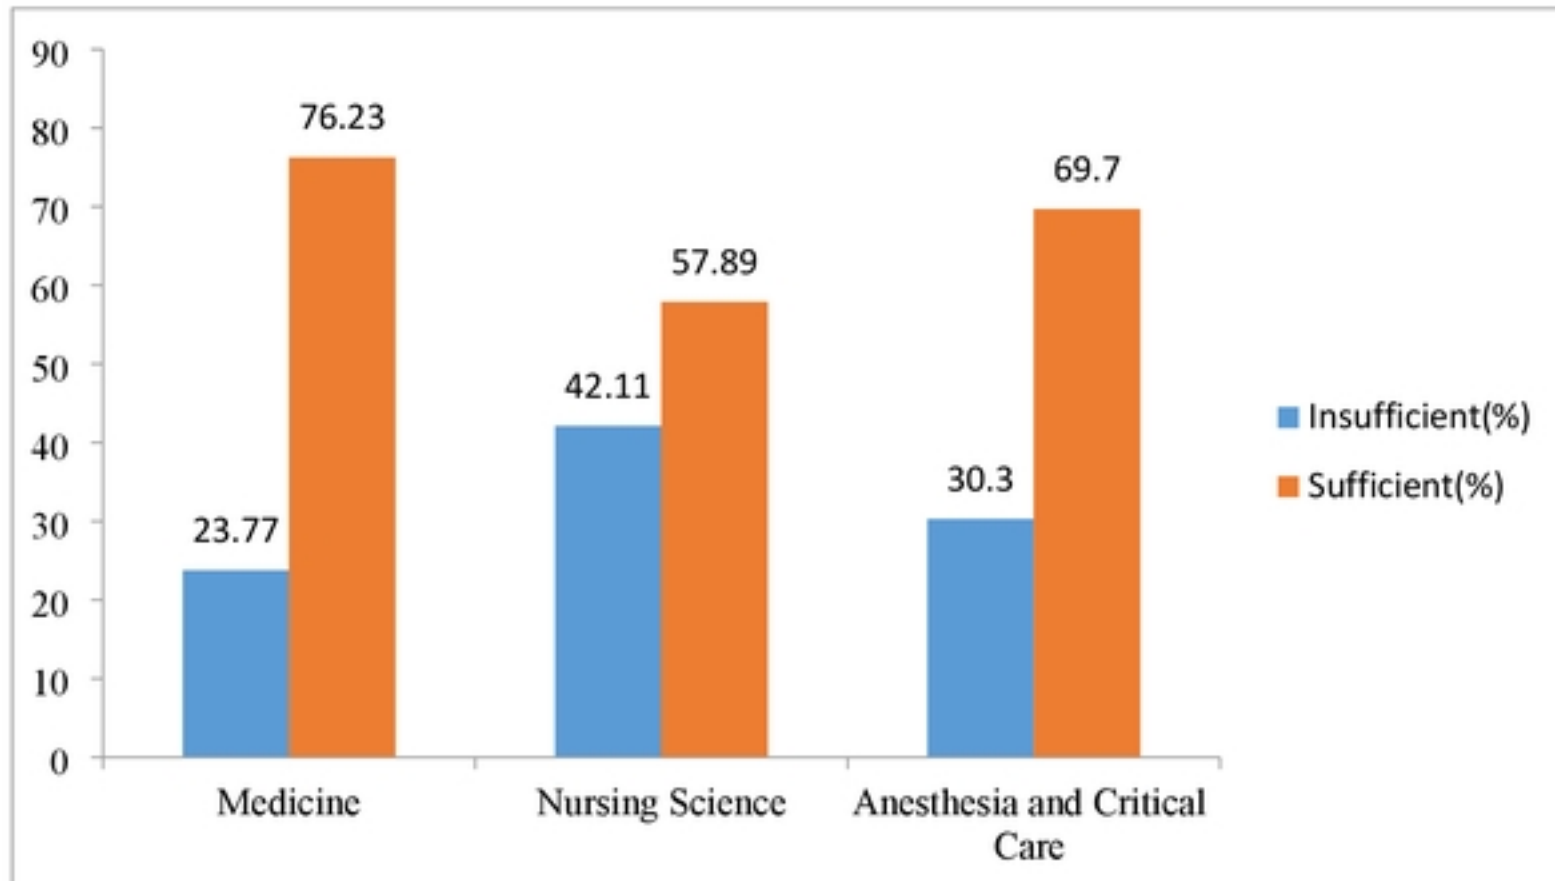

Figure 4: Showing knowledge levels of students in different study programs

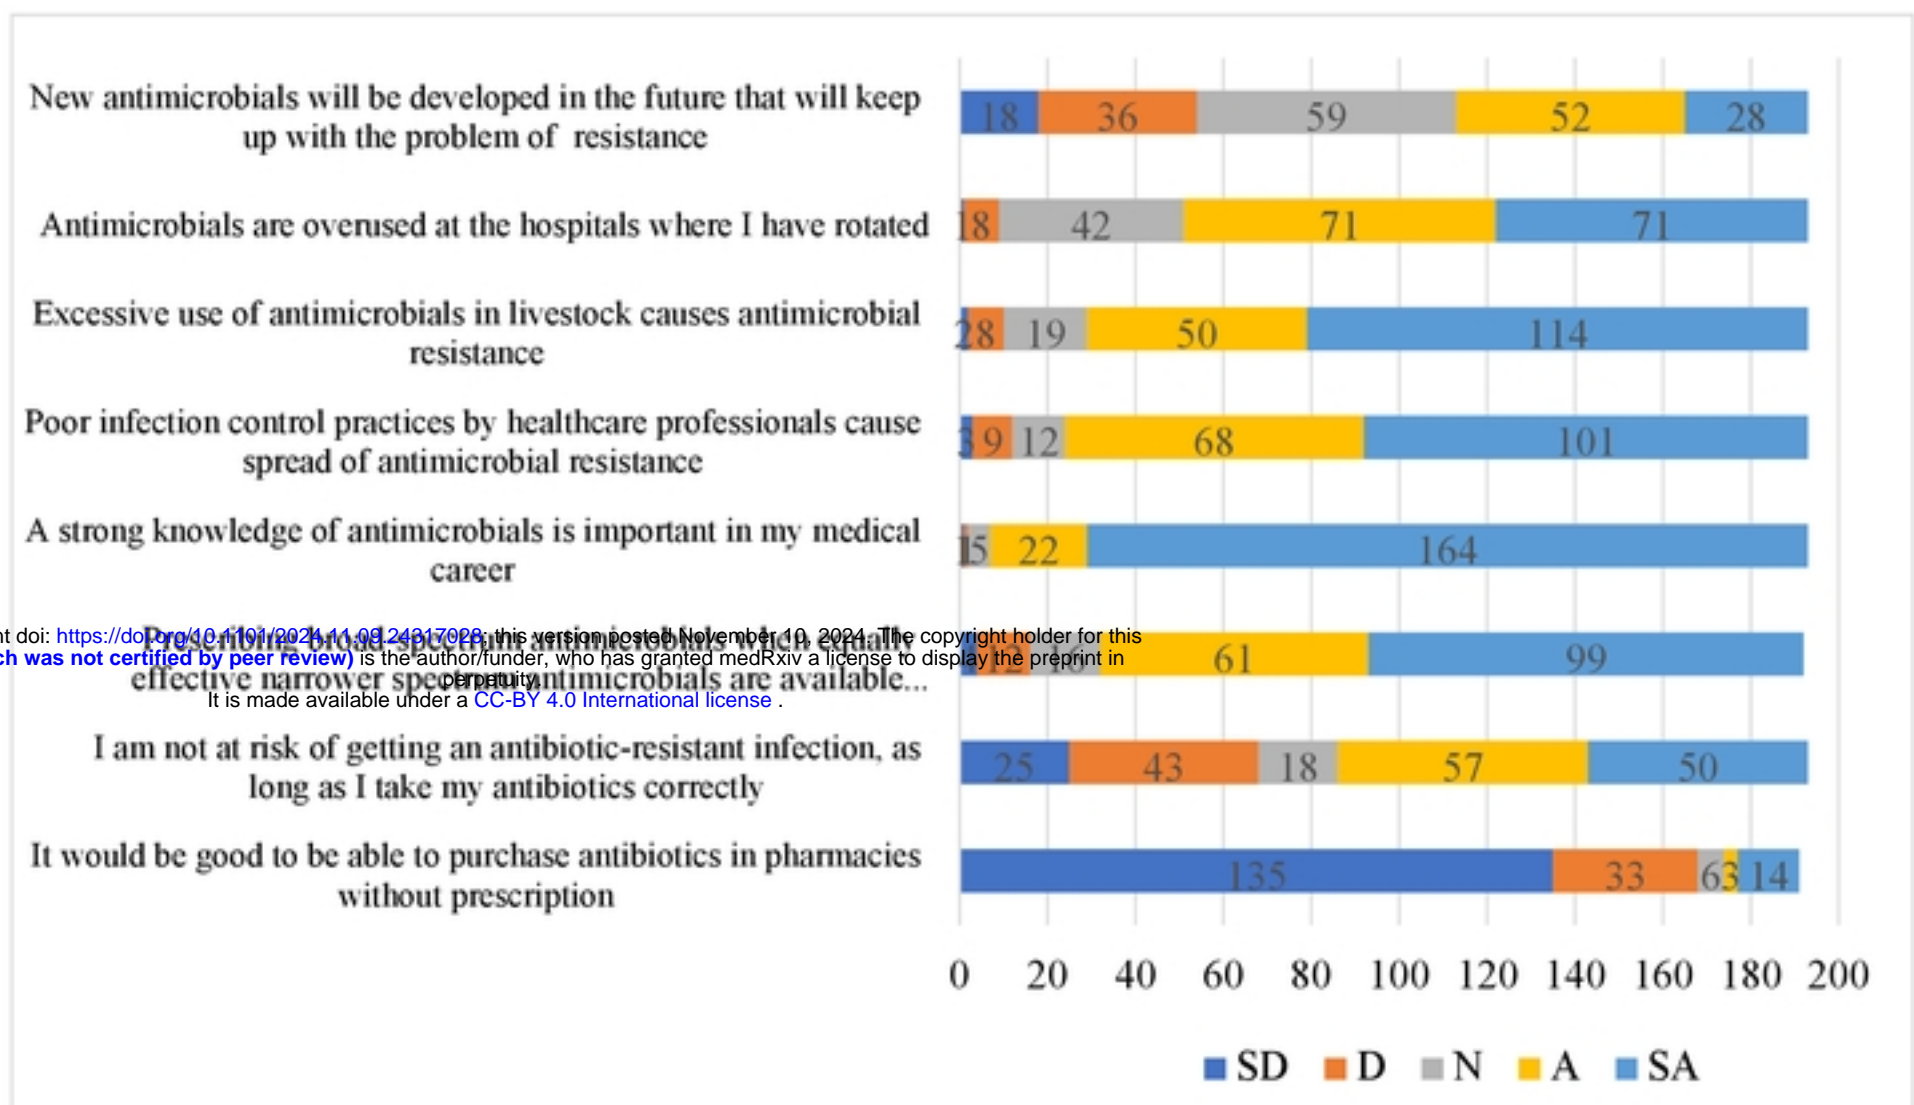

Figure 5: Showing students' attitudes towards AMR: SD-Strongly disagree, D-Disagree, N- Neutral, A-Agree, SA- Strongly Agree

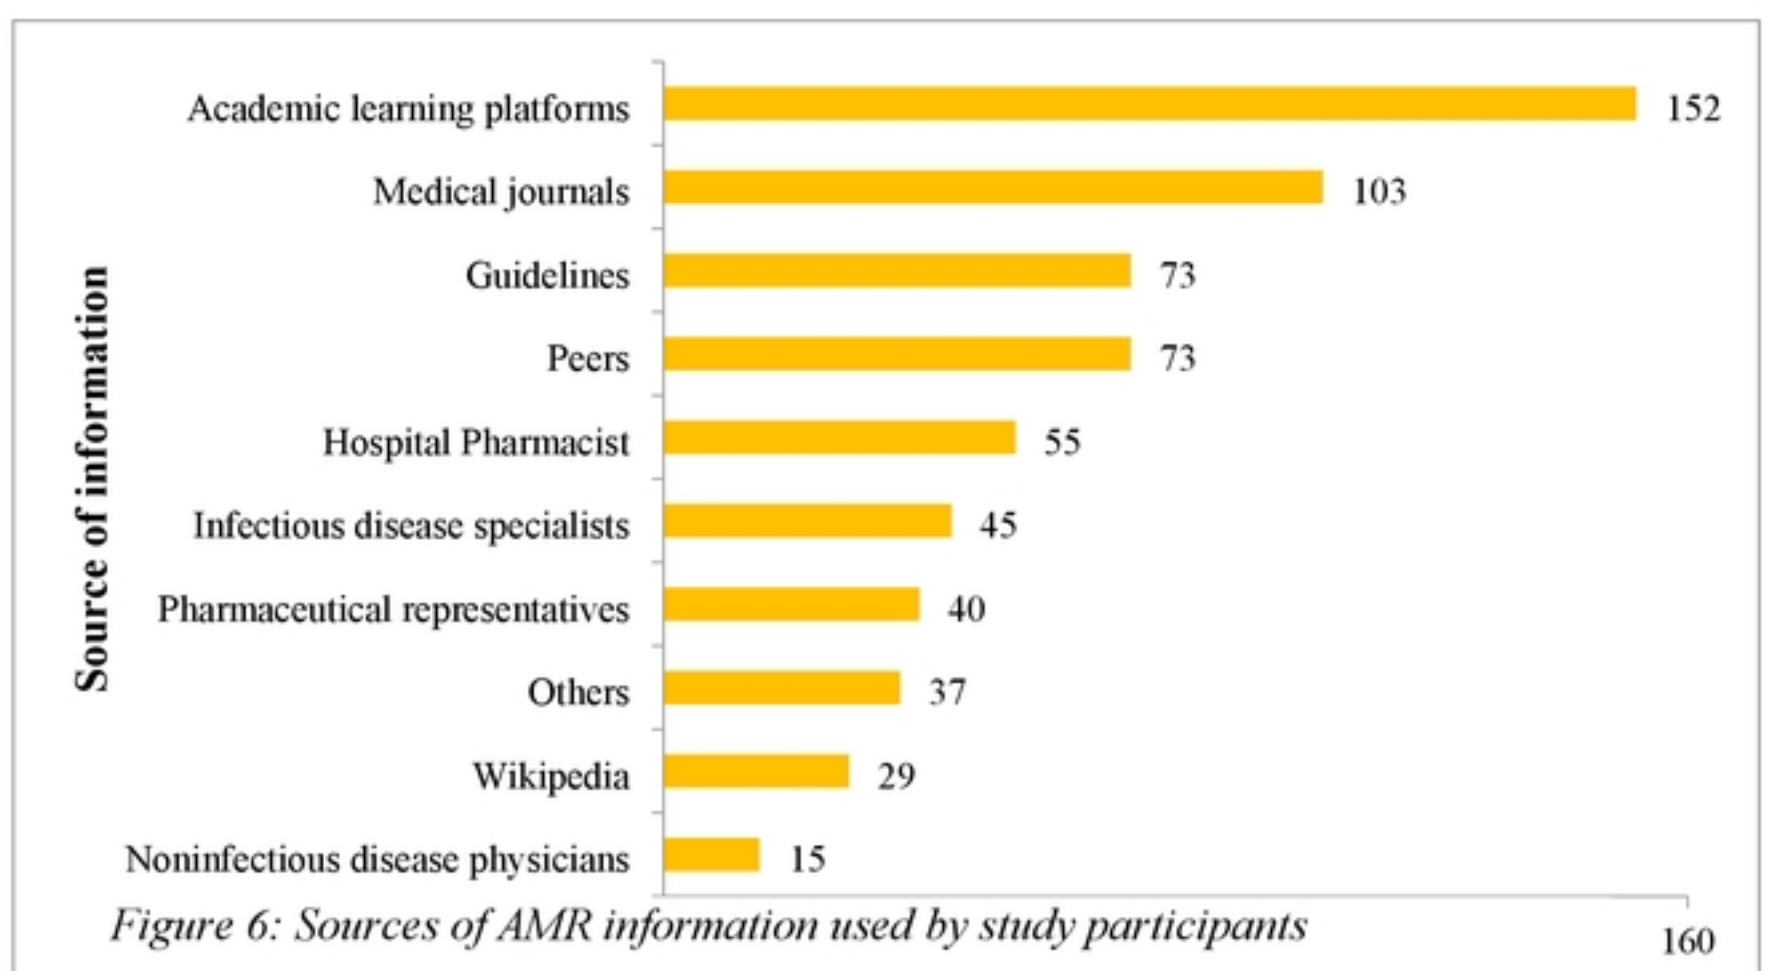

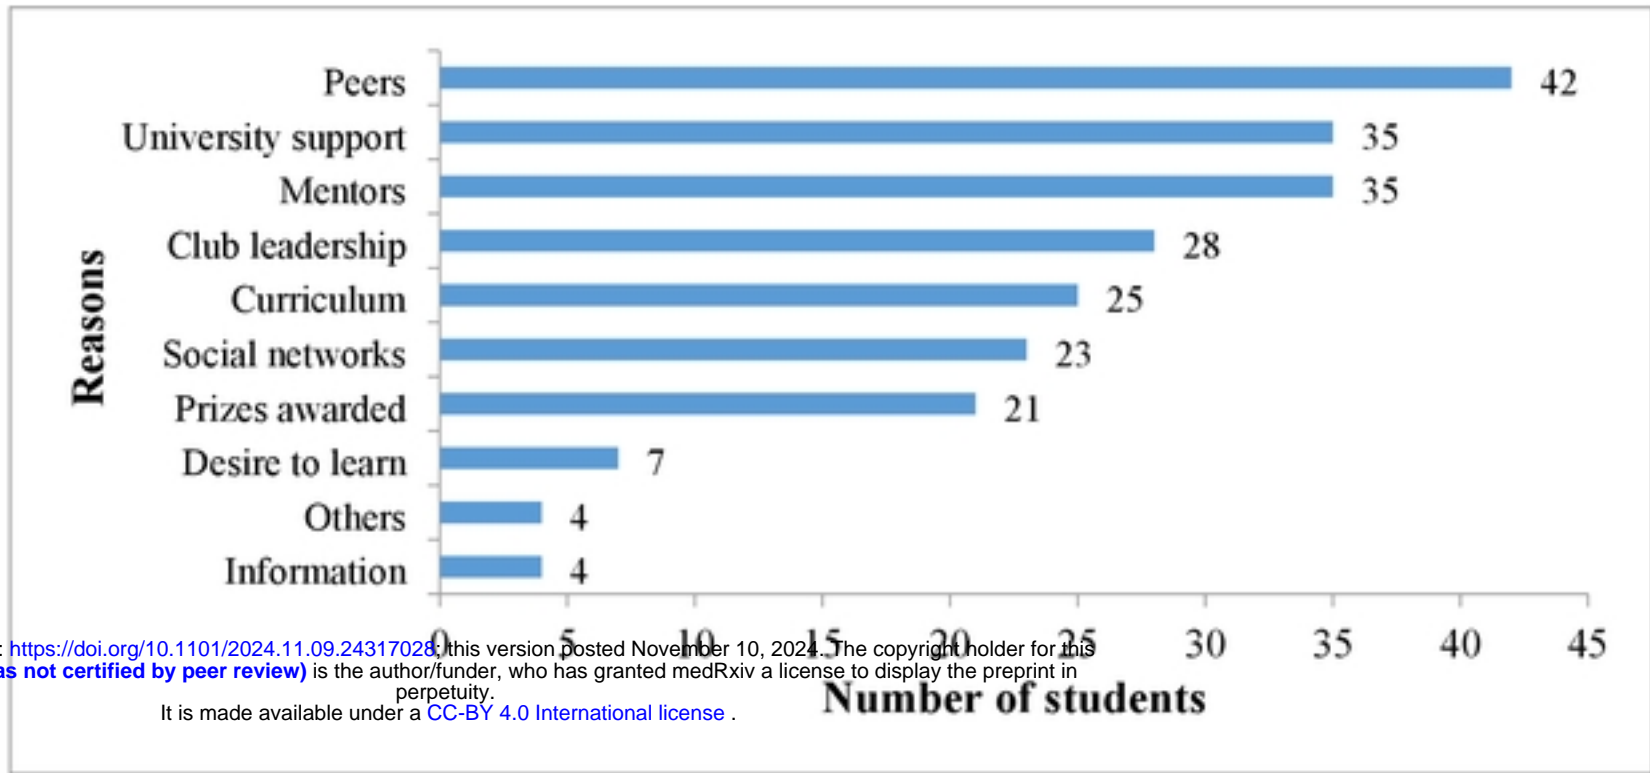

*Figure 7: Showing reasons for student engagement in AMR activities*

medRxiv preprint doi: <https://doi.org/10.1101/2024.11.09.24317028>; this version posted November 10, 2024. The copyright holder for this preprint **(which was not certified by peer review)** is the author/funder, who has granted medRxiv a license to display the preprint in perpetuity.  
It is made available under a [CC-BY 4.0 International license](#) .
